# Supplementary material for: A facile one-pot route towards three-dimensional graphene-based microporous N-doped carbon composites
Source: Royal Society of Chemistry journal article supplement (doi:10.1039/c4ra08945f), 2014-09-15
Supplement: c4ra08945f1.pdf [file c4ra08945f1.pdf]

## Electronic Supplementary Information

### A Facile Green One-pot Route Towards Three-Dimensional Graphene- Based micropores carbon composites Frameworks for High-Performance Electrochemical Capacitive Energy Storage

Zehui Zhang, Peiyi Wu \*

State Key Laboratory of Molecular Engineering of Polymers and Department of  
Macromolecular Science and Laboratory of Advanced Materials, Fudan University,  
Shanghai 200433, P.R. China

E-mail: peiyiwu@fudan.edu.cn.

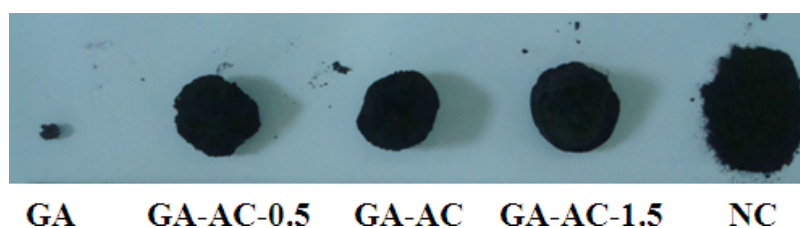

Figure S1. Digital photographs of the samples.

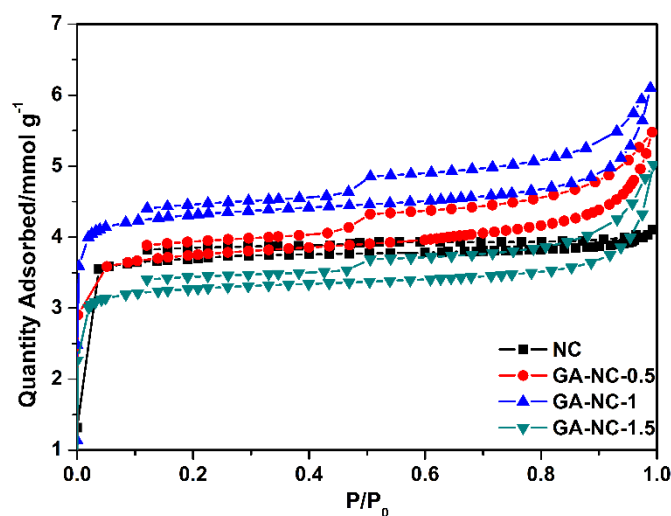

Figure S2. Isotherm plot of NC, GA-NC-0.5, GA-NC-1, GA-NC-1.5.

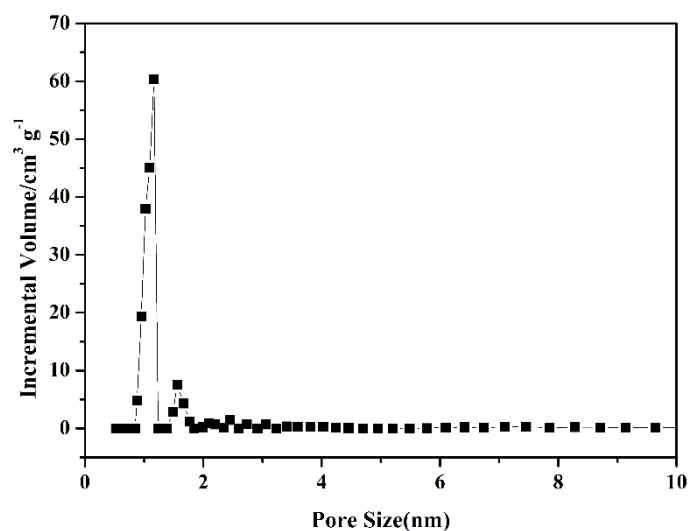

Figure S3. Pore size distribution plots obtained using the DFT method of the GA-NC-1.

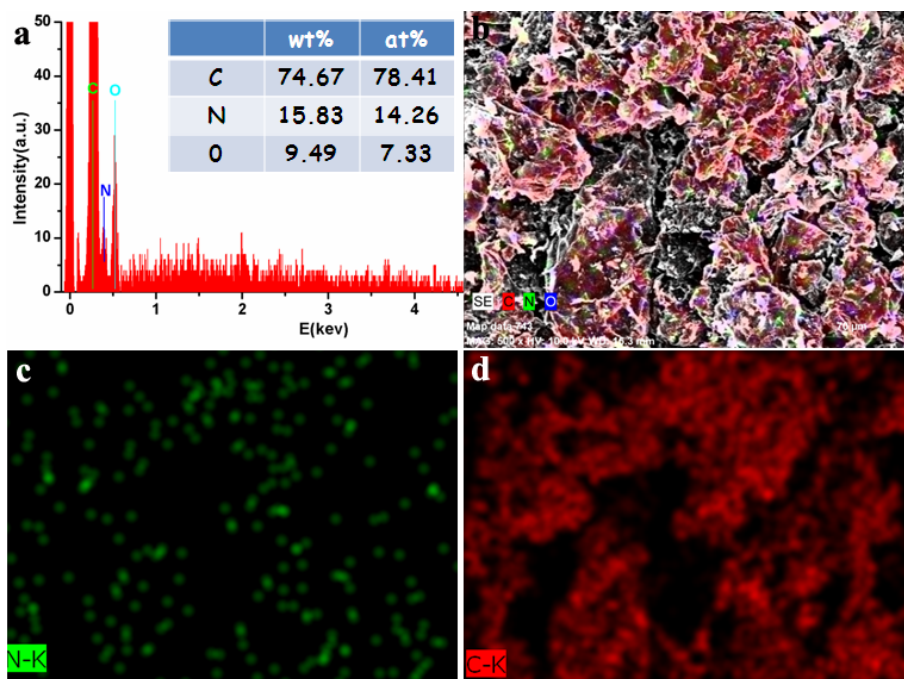

Figure S4. Elemental mapping images of GA-AC-1. (a) EDX spectrum suggest the homogeneous distribution of N and C in GA-AC-1. (b) Typical scanning electron microscopy image and corresponding elemental mapping images of (c) nitrogen and (d) carbon in the selected area.

Table S1. Element analysis of the chiotsan and GA-NC. The increase of carbon content indicates the sufficient carbonization during the high temperature treatment.

| Sample | C (%) | H (%) | N (%) | O (Calculated) (%) |
|--------|-------|-------|-------|--------------------|
|--------|-------|-------|-------|--------------------|

|          |       |      |      |       |
|----------|-------|------|------|-------|
| chiotsan | 41.33 | 7.95 | 7.78 | 42.84 |
| GA-NC    | 74.65 | 1.67 | 6.30 | 17.38 |

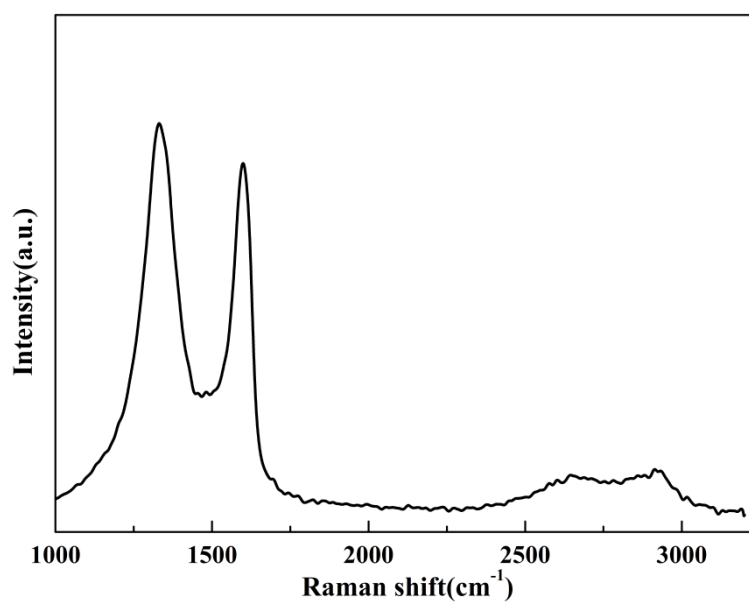

Figure S5. Raman spectra of GA-NC.

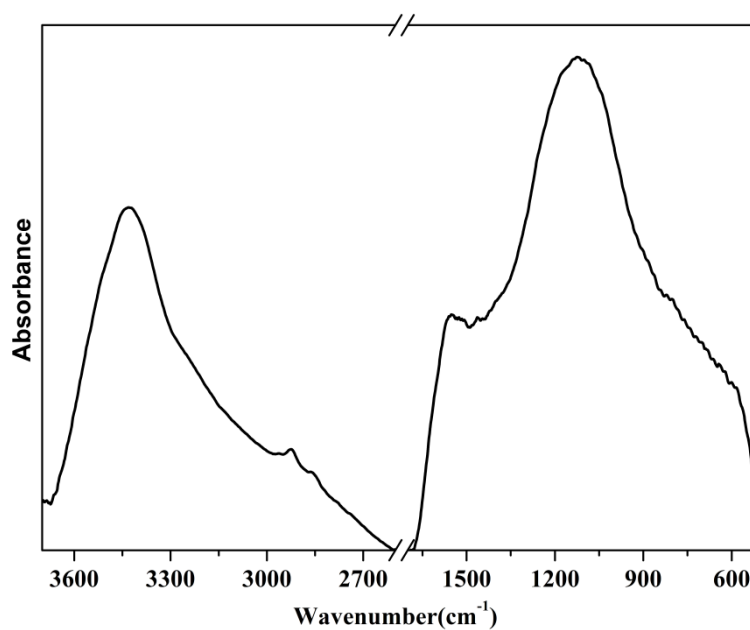

Figure S6. FTIR spectrum of GA-NC.

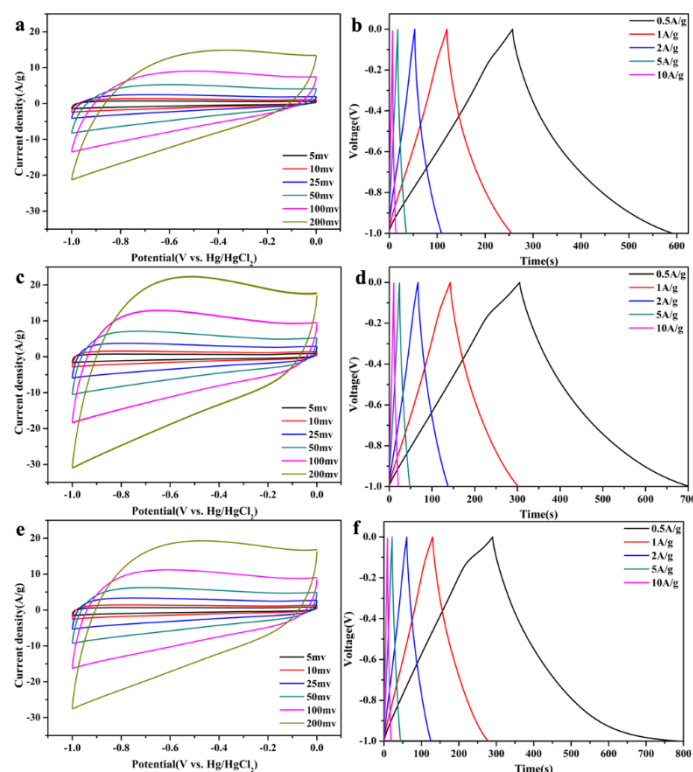

Figure S7. a), c), e) Cyclic voltammetry curves obtained at different scan rates for NC, GA-NC-0.5, GA-NC-1.5, respectively. b), d), f) Galvanostatic charge/discharge curves of NC, GA-NC-0.5, GA-NC-1.5 supercapacitor under different constant currents, respectively.

Table S2. Comparison of properties of various carbon-based materials as supercapacitors electrode materials

| Materials                          | Specific surface area ( $\text{m}^2\text{g}^{-1}$ ) | Specific capacity ( $\text{F g}^{-1}$ ) |
|------------------------------------|-----------------------------------------------------|-----------------------------------------|
| Activated carbons <sup>1</sup>     | 1000~2000                                           | 50~150                                  |
| Porous carbon spheres <sup>2</sup> | 757.3                                               | 260                                     |
| Mesoporous Carbon <sup>3</sup>     | 185                                                 | 70~110                                  |
| N-carbon nanofiber <sup>4</sup>    | 312                                                 | ~200                                    |
| Hydrothermal carbon <sup>5</sup>   | 109                                                 | 154                                     |
| Various Pollens <sup>6</sup>       | 1600~3000                                           | ~190                                    |
| Hydrothermal carbon <sup>7</sup>   |                                                     | 300                                     |
| N-graphene <sup>8</sup>            |                                                     | ~100                                    |

## References

- (1) E. Frackowiak, F. Béguin, *Carbon* **2001**, *39*, 937-950.
- (2) J. Wang, L. Shen, B. Ding, P. Nie, H. Deng, H. Dou,; X. Zhang, *RSC Adv.* **2014**, *4*, 7538-7544.
- (3) D. Saha, Y. Li,; Z. Bi, J. Chen, J. K. Keum, D. K. Hensley, H. A. Grappe, H. M. Meyer, S. Dai,; M. P. Paranthaman, A. K. Naskar, *Langmuir* **2014**, *30*, 900-910.
- (4) L.-F. Chen, Z.-H. Huang, H.-W. Liang, W.-T. Yao, Z.-Y. Yu, S.-H. Yu, *Energ. Environ. Sci.* **2013**, *6*, 3331-3338.
- (5) W. Si, J. Zhou, S. Zhang, S. Li, W. Xing, S. Zhuo, *Electrochim. Acta* **2013**, *107*, 397-405.
- (6) L. Zhang, F. Zhang, X. Yang, K. Leng, Y. Huang, Y. Chen, *Small* **2013**, *9*, 1342-1347.
- (7) C. Falco, J. M. Sieben, N. Brun, M. Sevilla, T. van der Maelen, E. Morallón, D. Cazorla-Amorós, M.-M. Titirici, *ChemSusChem* **2013**, *6*, 374-382.
- (8) P. Chen, J.-J. Yang, S.-S. Li, Z. Wang, T.-Y. Xiao, Y.-H. Qian, S.-H. Yu, *Nano Energ.* **2013**, *2*, 249-256.
